# Supplementary material for: Determinants of seat belt use behaviour: a protocol for a systematic review
Source: PubMed Central journal article supplement — BMJ Open. 2018 May 3;8(5):e020348. doi: 10.1136/bmjopen-2017-020348 (PMC5942405; doi:10.1136/bmjopen-2017-020348), 2018-05-03
Supplement: bmjopen-2017-020348supp001.pdf [file bmjopen-2017-020348supp001.pdf]

## **APPENDIX 1: Search strategy for MEDLINE via PubMed**

- 1. “Determinant Factor”**
- 2. Correlate**
- 3. Contributor**
- 4. Predictor**
- 5. Factor**
- 6. Determinant\***
- 7. 1 OR 2 OR 3 OR 4 OR 5 OR 6**
- 8. Seatbelt**
- 9. “Safety belt”**
- 10. “Belt seat”**
- 11. “Seat belt”**
- 12. “Road safety”**
- 13. 8 OR 9 OR 10 OR 11 OR 12**
- 14-(1990/01/01:2017/12/31[dp])**
- 14 – 7 AND 13 AND 14**
